# Supplementary material
Source: publisher figshare collection journal article supplement (https://tandf.figshare.com/ndownloader/files/21245145)
Supplement: Supplementary file 1 [file 21245145]

**Supplementary data**

**Figure 4: Time of last seizure in patients with (yes) and without (no) co-ingestants known to cause seizures**

**
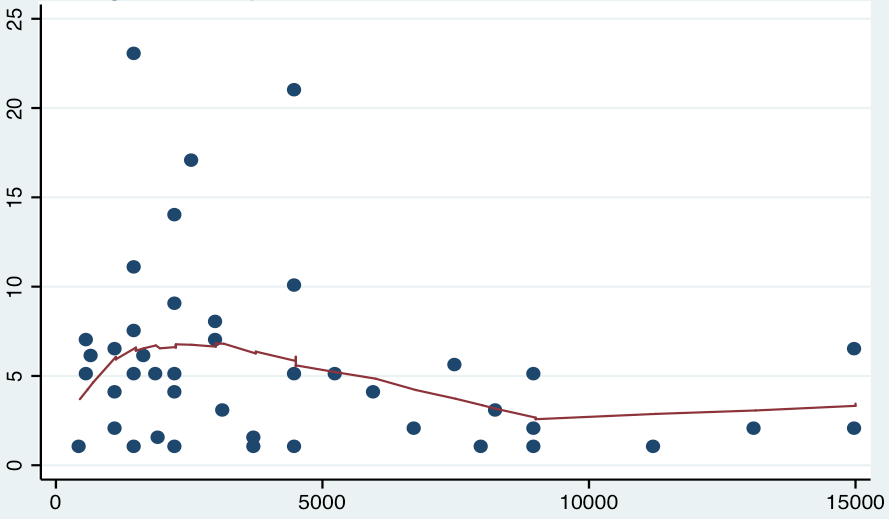
**
